# Supplementary material for: High-sensitivity hydrogen gas sensors based on Pd-decorated nanoporous poly(aniline-co-aniline-2-sulfonic acid):poly(4-styrenesulfonic acid)
Source: Royal Society of Chemistry journal article supplement (doi:10.1039/c3ta13741d), 2013-12-19
Supplement: c3ta13741d.pdf [file c3ta13741d.pdf]

Supplementary Information for:

**Journal of  
Materials Chemistry A**

**High-sensitivity hydrogen gas sensors based on  
Pd-decorated nanoporous poly(aniline-*co*-  
aniline-2-sulfonic acid):poly(4-styrenesulfonic  
acid)**

*Sunghun Cho,<sup>a</sup> Jun Seop Lee,<sup>a</sup> Jaemoon Jun<sup>a</sup> and Jyongsik Jang<sup>\*a</sup>*

<sup>a</sup>WCU Program of Chemical Convergence for Energy and Environment (C2E2), School of  
Chemical and Biological Engineering, College of Engineering, Seoul National University,  
Shinlimdong 56-1, Seoul 151-742, Korea.

\*E-mail: jsjang@plaza.snu.ac.kr

Tel.: +82-2-880-7069

Fax: +82-2-888-1604

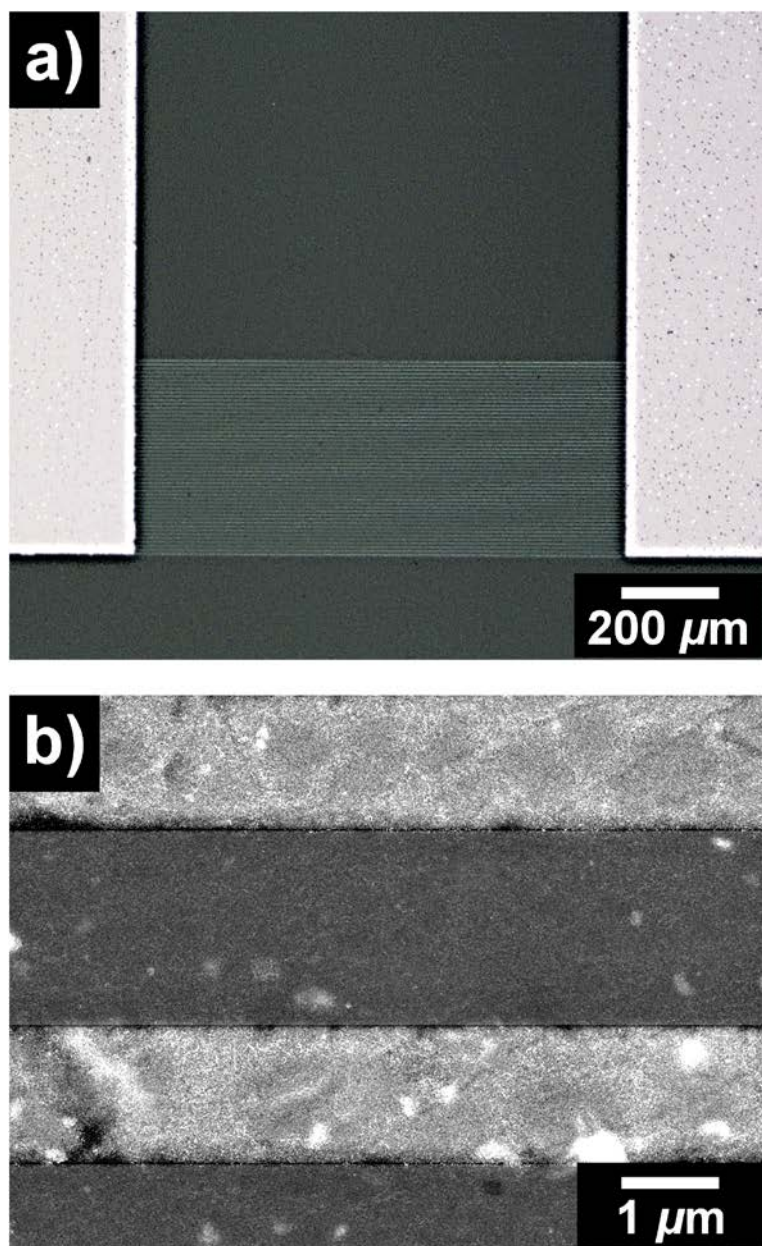

**Figure S1.** (a) Optical microscopy and (b) FE-SEM images of interdigitated microelectrode used.

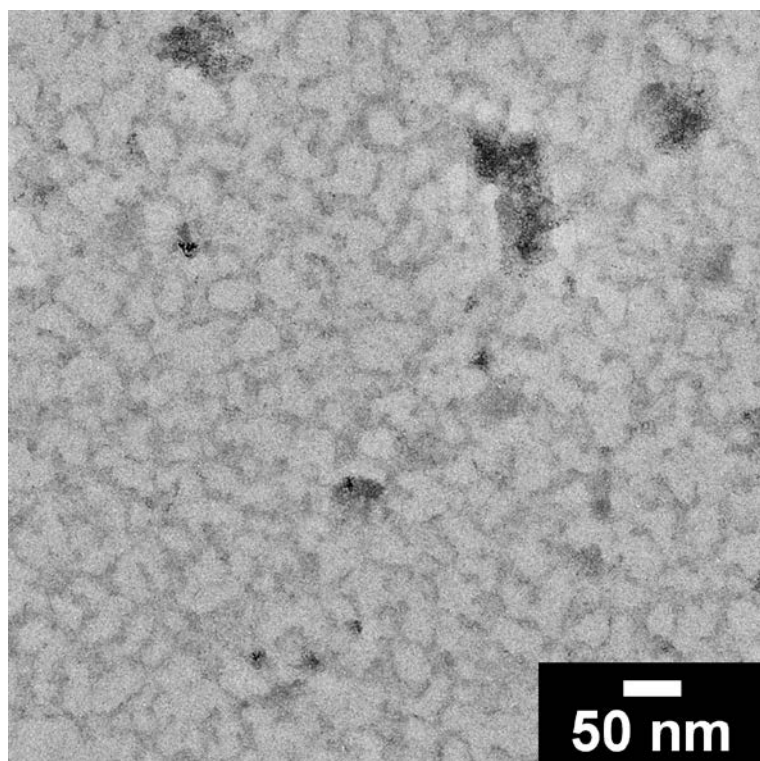

**Figure S2.** TEM image of pristine P(ANI-*co*-ASA):PSS nanostructure.

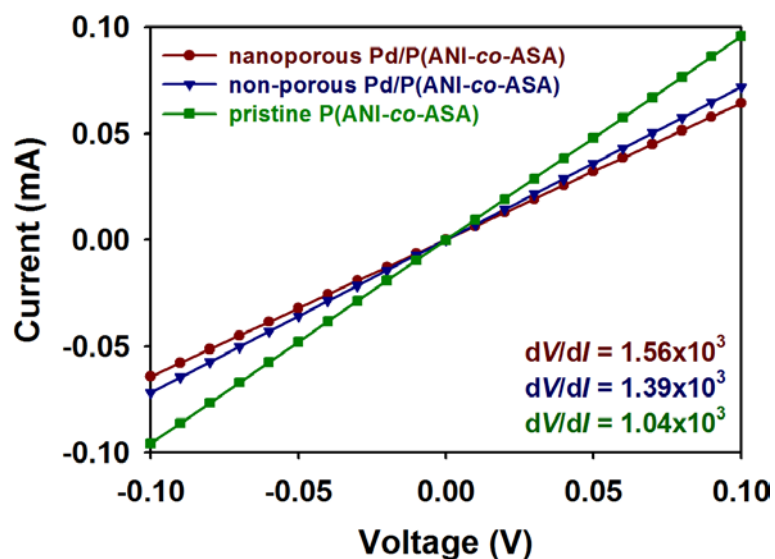

**Figure S3.** *I-V* characteristics of P(ANI-co-ASA):PSS nanostructures with thickness of 10  $\mu\text{m}$  integrated in the sensor substrate at a scan rate of 10  $\text{mV s}^{-1}$ .

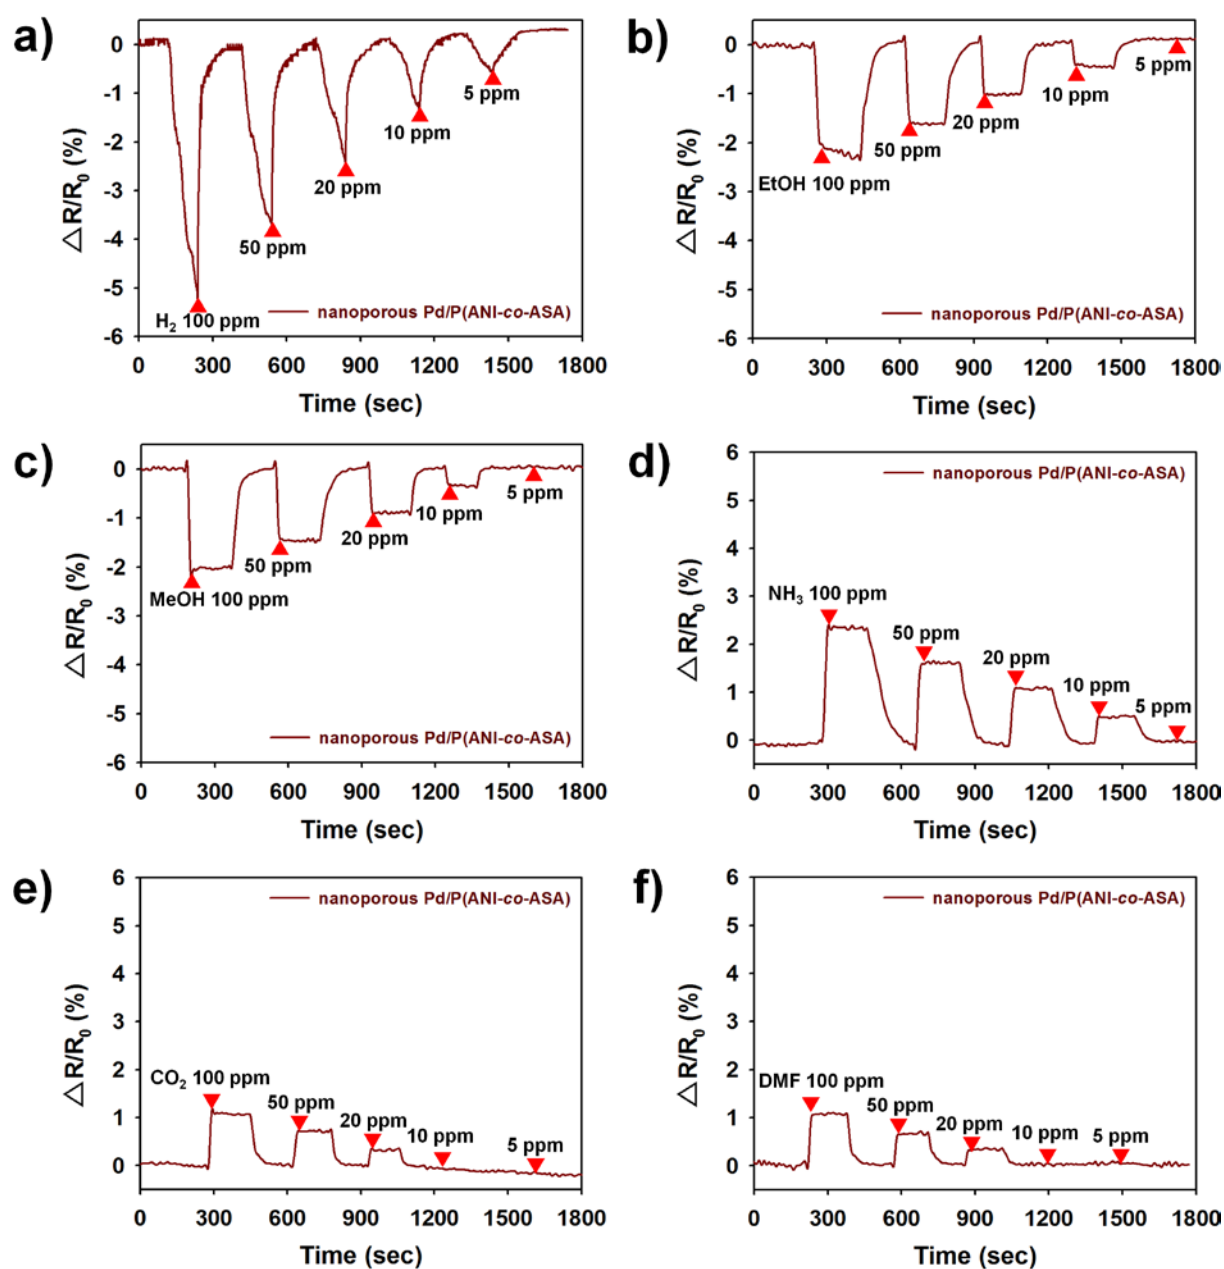

**Figure S4.** Real-time responses of P(ANI-co-ASA):PSS nanostructures upon cyclic exposure to various analytes (5 to 100 ppm) and synthetic air streams: (a) H<sub>2</sub>, (b) EtOH, (c) MeOH, (d) NH<sub>3</sub>, (e) CO<sub>2</sub>, and (f) DMF.

**Table S1.** Conductivity of Pd-decorated nanoporous P(ANI-co-ASA):PSS nanostructure as a function of heating temperature.

| heating temperature<br>(°C) | <sup>a</sup> conductivity<br>(S cm <sup>-1</sup> ) |
|-----------------------------|----------------------------------------------------|
| 25                          | 6.20±0.30                                          |
| 50                          | 6.15±0.30                                          |
| 100                         | 5.40±0.35                                          |
| 150                         | 4.20±0.40                                          |
| 200                         | 0.75±0.45                                          |

<sup>a</sup>P(ANI-co-ASA):PSS nanostructures with thickness of 5 μm were measured.

**Table S2.** BET Surface areas of P(ANI-co-ASA):PSS nanostructures obtained by N<sub>2</sub> adsorption/desorption characteristics

| Sample                  | surface area<br>(m <sup>2</sup> g <sup>-1</sup> ) | total pore volume<br>(cm <sup>3</sup> g <sup>-1</sup> ) |
|-------------------------|---------------------------------------------------|---------------------------------------------------------|
| Pristine                | 8.7                                               | 0.04                                                    |
| Pd-decorated non-porous | 13.7                                              | 0.06                                                    |
| Pd-decorated nanoporous | 23.1                                              | 0.10                                                    |
